# Supplementary material for: NanR, a Transcriptional Regulator That Binds to the Promoters of Genes Involved in Sialic Acid Metabolism in the Anaerobic Pathogen Clostridium perfringens
Source: PubMed Central journal article supplement (PMC4509764; doi:10.1371/journal.pone.0133217), 2015-07-21

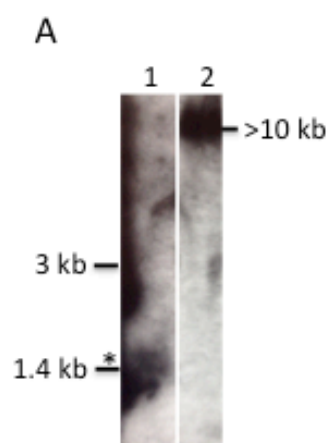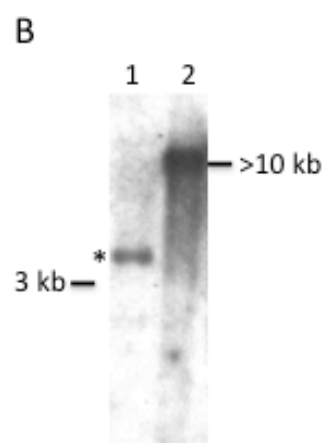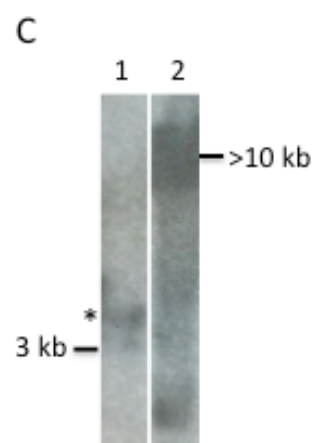

Supplement: pone.0133217.s001.pdf [file pone.0133217.s001.pdf]
